# Supplementary material for: PUMILIO, but not RBMX, binding is required for regulation of genomic stability by noncoding RNA NORAD
Source: eLife journal article supplement (doi:10.7554/elife.48625), 2019-07-25
Supplement: supp [file elife-48625-supp-v1.zip]

Archive with 5 entries (5 files):
- elife_poa_e48625_Supplementary_file_1.xlsx
- elife_poa_e48625_Transparent_Reporting_File.docx
- elife_poa_e48625_Figure_4_figure_supplement_1.pdf
- elife_poa_e48625_Figure_3_figure_supplement_1.pdf
- elife_poa_e48625_Figure_2_figure_supplement_1.pdf
