# Supplementary material for: PUMILIO, but not RBMX, binding is required for regulation of genomic stability by noncoding RNA NORAD
Source: eLife journal article supplement (doi:10.7554/elife.48625), 2019-07-25
Supplement: supp [file elife-48625-supp-v1.zip › elife_poa_e48625_Supplementary_file_1.xlsx]

## Sheet: Sheet1
Supplementary Table 1: Oligonucleotides
Oligonucleotide name/description	Sequence	Notes
NORAD FISH probe#1 fwd primer	AGTTCCGGTCCGGCAGAGAT
NORAD FISH probe#1 rev primer (SP6 promoter)	gacATTTAGGTGACACTATAGTCGTCAGGACTAGGTAGGTC	bold represents SP6 promoter
NORAD FISH probe#2 fwd primer	CAACGGACAAAGGCCTTAAGGG
NORAD FISH probe#2 rev primer (SP6 promoter)	gacATTTAGGTGACACTATAGGACCAGTCTAGCATAGAACCTTCTT	bold represents SP6 promoter
NORAD FISH probe#3 fwd primer	GGGTTAGATGACATGGAGCTGGAA
NORAD FISH probe#3 rev primer (SP6 promoter)	gacATTTAGGTGACACTATAGTTCTGGCCTAGAACCCTTCCCAT	bold represents SP6 promoter
NORAD FISH probe#4 fwd primer	GGGTTCTAGGCCAGAATGTTCACA
NORAD FISH probe#4 rev primer (SP6 promoter)	gacATTTAGGTGACACTATAGGCTTAGAGATGGTCAAACAAATTCC	bold represents SP6 promoter
NORAD FISH probe#5 fwd primer	CCATCTCTAAGCATTACACGTGCC
NORAD FISH probe#5 rev primer (SP6 promoter)	gacATTTAGGTGACACTATAGGTCCTTTTCAGAAGACAGCCTTTCTA	bold represents SP6 promoter
NORAD FISH probe#6 fwd primer	GGCTGTCTTCTGAAAAGGACTTTTG
NORAD FISH probe#6 rev primer (SP6 promoter)	gacATTTAGGTGACACTATAGGTAATGCTTAGGGGGGGTTTTAAC	bold represents SP6 promoter
NORAD FISH probe#7 fwd primer	CAGATGGCTTATAGCTGTCCACG
NORAD FISH probe#7 rev primer (SP6 promoter)	gacATTTAGGTGACACTATAGTTTTGAAACGGAGCCTCGCTC	bold represents SP6 promoter
NORAD FISH probe#8 fwd primer	CCGTTTCAAAAAAAAAAGTGCACAAT
NORAD FISH probe#8 rev primer (SP6 promoter)	gacATTTAGGTGACACTATAGGGTGGACTAATAAAGGTCACTCCC	bold represents SP6 promoter
NORAD FISH probe#9 fwd primer	CCACCCCTTGGAGCTAGACAT
NORAD FISH probe#9 rev primer (SP6 promoter)	gacATTTAGGTGACACTATAGACACACAGCAACAGAATACAGTATG	bold represents SP6 promoter
NORAD FISH probe#10 fwd	TGTTCATTAGGTTGGCAGCA
NORAD FISH probe#10 rev primer (SP6 promoter)	gacATTTAGGTGACACTATAGTTCTTCTAGATCCTGTGTGTAGGC	bold represents SP6 promoter
NORAD FISH probe#11 fwd	GAGCATTAAGGGAATGCAGCAT
NORAD FISH probe#11 rev primer (SP6 promoter)	gacATTTAGGTGACACTATAGCAATGGAGGGAGGAGTCAAAGATG	bold represents SP6 promoter
NORAD 5' end qRT-PCR fwd primer	CTCTGCTGTGGCTGCCC
NORAD 5' end qRT-PCR rev primer	GGGTGGGAAAGAGAGGTTCG
NORAD 3' end qRT-PCR fwd primer	TGATAGGATACATCTTGGACATGGA
NORAD 3' end qRT-PCR rev primer	TGGACACATCTGCATACATCTCT
NORAD ND4 qRT-PCR fwd primer	GGAGAGGAGTTGGAAGGAATG
NORAD ND4 qRT-PCR rev primer	TGTCCGCTATATACACAGTAGG
GAPDH qRT-PCR fwd primer	AGCCACATCGCTCAGACAC
GAPDH qRT-PCR rev primer	GCCCAATACGACCAAATCC
NEAT1 qRT-PCR fwd primer	AGGCAGGGAGAGGTAGAAGG
NEAT1 qRT-PCR rev primer	TGGCATGGACAAGTTGAAGA
RBMX qRT-PCR fwd primer	CAGTTCGCAGTAGCAGTGGA
RBMX qRT-PCR rev primer	TCGAGGTGGACCTCCATAAC
NORAD full length construct fwd primer (cloning into AAVS1 plasmid)	ttcgaattctgcagtcgacggtaccAGTTCCGGTCCGGCAGAGAT	lower case sequence represents homology for HiFi assembly
NORAD full length construct rev primer (cloning into AAVS1 plasmid)	caataaacaagttaacaacaacaattgCAATGGAGGGAGGAGTCAAA	lower case sequence represents homology for HiFi assembly
NORAD 5' deletion construct fwd primer (cloning into AAVS1 plasmid)	ttcgaattctgcagtcgacggtaccATTCTCATTTGTTTAAAAGA	lower case sequence represents homology for HiFi assembly
NORAD 5' deletion construct rev primer (cloning into AAVS1 plasmid)	caataaacaagttaacaacaacaattgCAATGGAGGGAGGAGTCAAA	lower case sequence represents homology for HiFi assembly
NORAD 5' fragment construct fwd primer (cloning into AAVS1 plasmid)	ttcgaattctgcagtcgacggtaccCAGAACGCAGCCCGCTCCTC	lower case sequence represents homology for HiFi assembly
NORAD 5' fragment construct rev primer (cloning into AAVS1 plasmid)	caataaacaagttaacaacaacaattgTTACAAGATGTGTAACTTTC	lower case sequence represents homology for HiFi assembly
NORAD ND4 fragment construct fwd primer (cloning into AAVS1 plasmid)	ttcgaattctgcagtcgacggtaccAATGCTGTTTGGAAGTGGAAT	lower case sequence represents homology for HiFi assembly
NORAD ND4 fragment construct rev primer (cloning into AAVS1 plasmid)	caataaacaagttaacaacaacaattgGCACAAATATCAAAATGGGTA	lower case sequence represents homology for HiFi assembly
sgRNA NORAD CRISPRi knockdown	GTTCTCTGCGCTGGCAAGAG
sgRNA RBMX CRISPRi knockdown	GCGCAACGAGGGCGAACAA
