# Supplementary figures and images for: PUMILIO, but not RBMX, binding is required for regulation of genomic stability by noncoding RNA NORAD
Source: eLife journal article supplement (doi:10.7554/elife.48625), 2019-07-25

Figure 2 - figure supplement 1

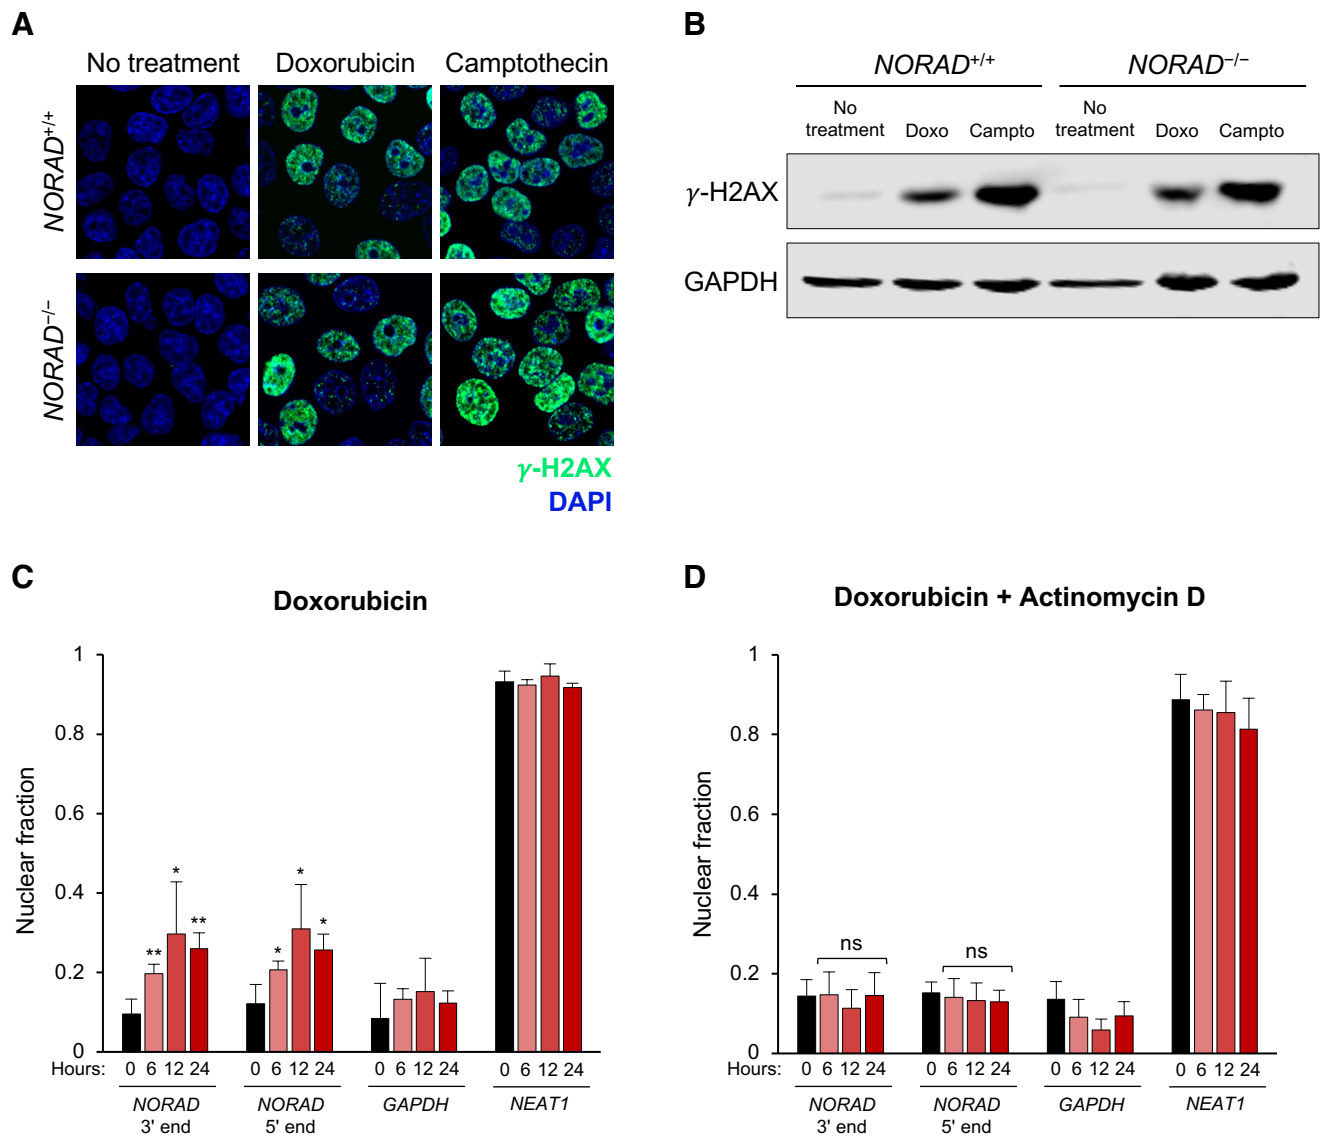

Supplement: supp [file elife-48625-supp-v1.zip]

Figure 4 - figure supplement 1

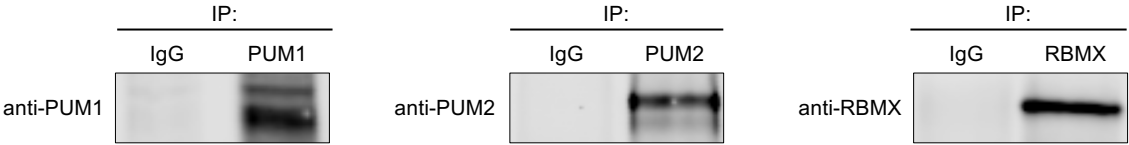

Supplement: supp [file elife-48625-supp-v1.zip]

Figure 3 - figure supplement 1

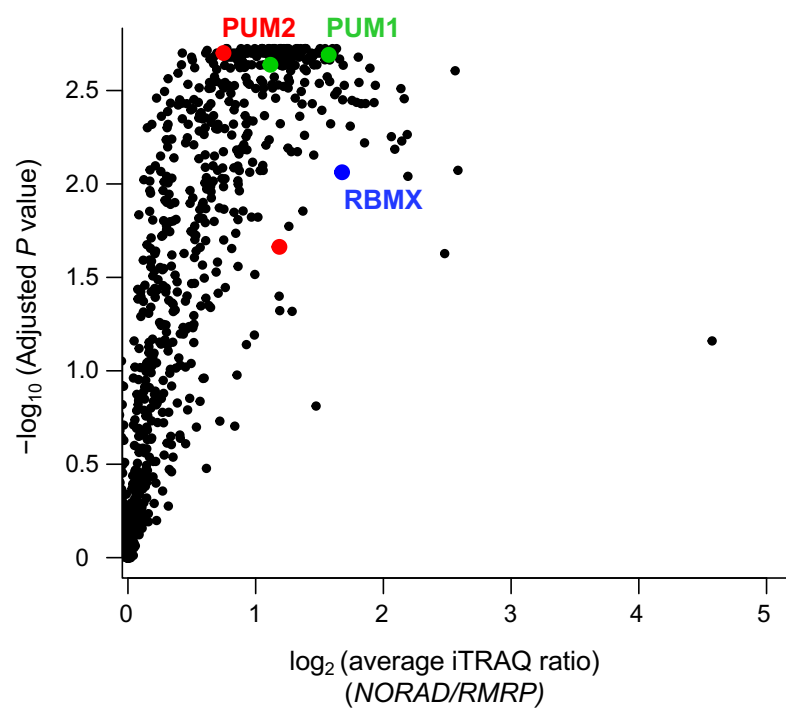

Supplement: supp [file elife-48625-supp-v1.zip]
